# Supplementary material
Source: ML conference proceedings conference paper supplement (https://proceedings.mlr.press/v130/doan21a.html)
Supplement: Supplementary file 2 [file doan21a-supp.zip]

Archive with 13 entries (10 files):
- code/
- code/tools.py
- code/main.py
- code/models/
- code/models/mlp.py
- code/models/lenet.py
- code/models/__init__.py
- code/dataloaders/
- code/dataloaders/wrapper.py
- code/dataloaders/datasetGen.py
- code/dataloaders/base.py
- code/dataloaders/__init__.py
- 444-sup.pdf
