# Supplementary material
Source: ML conference proceedings conference paper supplement (https://proceedings.mlr.press/v130/doan21a.html)
Supplement: Supplementary file 2 [file doan21a-supp.zip › code/dataloaders/datasetGen.py]

import torch
from random import shuffle
from .wrapper import Subclass, AppendName, Permutation


def SplitGen(train_dataset, val_dataset, first_split_sz=2, other_split_sz=2, rand_split=False, remap_class=False):
    '''
    Generate the dataset splits based on the labels.
    :param train_dataset: (torch.utils.data.dataset)
    :param val_dataset: (torch.utils.data.dataset)
    :param first_split_sz: (int)
    :param other_split_sz: (int)
    :param rand_split: (bool) Randomize the set of label in each split
    :param remap_class: (bool) Ex: remap classes in a split from [2,4,6 ...] to [0,1,2 ...]
    :return: train_loaders {task_name:loader}, val_loaders {task_name:loader}, out_dim {task_name:num_classes}
    '''
    assert train_dataset.number_classes==val_dataset.number_classes,'Train/Val has different number of classes'
    num_classes =  train_dataset.number_classes

    # Calculate the boundary index of classes for splits
    # Ex: [0,2,4,6,8,10] or [0,50,60,70,80,90,100]
    split_boundaries = [0, first_split_sz]
    while split_boundaries[-1]<num_classes:
        split_boundaries.append(split_boundaries[-1]+other_split_sz)
    print('split_boundaries:',split_boundaries)
    assert split_boundaries[-1]==num_classes,'Invalid split size'

    # Assign classes to each splits
    # Create the dict: {split_name1:[2,6,7], split_name2:[0,3,9], ...}
    if not rand_split:
        class_lists = {str(i):list(range(split_boundaries[i-1],split_boundaries[i])) for i in range(1,len(split_boundaries))}
    else:
        randseq = torch.randperm(num_classes)
        class_lists = {str(i):randseq[list(range(split_boundaries[i-1],split_boundaries[i]))].tolist() for i in range(1,len(split_boundaries))}
    print(class_lists)

    # Generate the dicts of splits
    # Ex: {split_name1:dataset_split1, split_name2:dataset_split2, ...}
    train_dataset_splits = {}
    val_dataset_splits = {}
    task_output_space = {}
    for name,class_list in class_lists.items():
        # print(class_list)
        train_dataset_splits[name] = AppendName(Subclass(train_dataset, class_list, remap_class), name)
        val_dataset_splits[name] = AppendName(Subclass(val_dataset, class_list, remap_class), name)
        task_output_space[name] = len(class_list)
   

    return train_dataset_splits, val_dataset_splits, task_output_space


def PermutedGen(train_dataset, val_dataset, n_permute, remap_class=False):
    sample, _ = train_dataset[0]
    n = sample.numel()
    train_datasets = {}
    val_datasets = {}
    task_output_space = {}
    for i in range(1,n_permute+1):
        rand_ind = list(range(n))
        shuffle(rand_ind)
        name = str(i)
       
        if i==1:  # First task has no permutation
            train_datasets[name] = AppendName(train_dataset, name)
            val_datasets[name] = AppendName(val_dataset, name)
        else:
            # For incremental class scenario, use remap_class=True
            first_class_ind = (i-1)*train_dataset.number_classes if remap_class else 0
            train_datasets[name] = AppendName(Permutation(train_dataset, rand_ind), name, first_class_ind=first_class_ind)
            val_datasets[name] = AppendName(Permutation(val_dataset, rand_ind), name, first_class_ind=first_class_ind)
        task_output_space[name] = train_dataset.number_classes

    return train_datasets, val_datasets, task_output_space


def RotatedGen(Dataset, dataroot, train_aug, n_rotate, rotate_step, remap_class=False,subset_size=1000):
    train_datasets = {}
    val_datasets = {}
    task_output_space = {}
    rotate_angle = 0
    for task_id in range(1, n_rotate + 1):
        train_dataset, val_dataset = Dataset(dataroot=dataroot, train_aug=train_aug, angle=rotate_angle,subset_size=subset_size)
        task_name = str(task_id)
      
        first_class_ind = (task_id - 1) * train_dataset.number_classes if remap_class else 0
        assert train_dataset.number_classes == 10 and first_class_ind == 0
        # AppendName is a dataset
        train_datasets[task_name] = AppendName(train_dataset,
                                          task_name, first_class_ind=first_class_ind)
        val_datasets[task_name] = AppendName(val_dataset,
                                        task_name, first_class_ind=first_class_ind)

        task_output_space[task_name] = train_dataset.number_classes
        rotate_angle += rotate_step

    return train_datasets, val_datasets, task_output_space
